# Supplementary material for: Involvement of Carnosic Acid in the Phytotoxicity of Rosmarinus officinalis Leaves
Source: PubMed Central journal article supplement (PMC6316382; doi:10.3390/toxins10120498), 2018-11-26
Supplement: toxins-10-00498-s001.pdf [file toxins-10-00498-s001.pdf]

# Supplementary Materials: Involvement of Carnosic Acid in the Phytotoxicity of *Rosmarinus officinalis* Leaves

Kwame Sarpong Appiah, Hossein Korrani Mardani, Richard Ansong Omari, Vincent Yao Eziah, John Ofosu-Anim, Siaw Onwona-Agyeman, Christiana Adukwei Amoatey, Kiyokazu Kawada, Keisuke Katsura, Yosei Oikawa and Yoshiharu Fujii

Table S1. Allelopathic activities of medicinal plants collected from southern Ghana using the Sandwich method.

| No. of Plants | Family          | Part Used | Scientific Names                                      | Growth Elongation (% of Control) |           |         |           | Criteria |
|---------------|-----------------|-----------|-------------------------------------------------------|----------------------------------|-----------|---------|-----------|----------|
|               |                 |           |                                                       | 10 mg                            |           | 50 mg   |           |          |
|               |                 |           |                                                       | Radicle                          | Hypocotyl | Radicle | Hypocotyl |          |
| 1             | Euphorbiaceae   | Leaves    | <i>Bridelia micrantha</i> Baill.                      | 2.7                              | 2.0       | 1.7     | 2.1       | ****     |
| 2             | Myrtaceae       | Leaves    | <i>Syzygium malaccense</i> (L.) Merr. & L.M.Perry     | 3.9                              | 6.3       | 2.5     | 8.0       | ****     |
| 3             | Lamiaceae       | Leaves    | <i>Rosmarinus officinalis</i> L.                      | 4.3                              | 5.6       | 2.1     | 2.0       | ****     |
| 4             | Apocynaceae     | Seeds     | <i>Voacanga africana</i> Stapf ex Scott Elliot        | 9.2                              | 21.2      | 3.2     | 8.7       | ***      |
| 5             | Caesalpiniaceae | Leaves    | <i>Delonix regia</i> (Bojer) Raf.                     | 9.7                              | 35.8      | 6.1     | 27.4      | ***      |
| 6             | Fabaceae        | Leaves    | <i>Pterocarpus santalinoides</i> L'Hér. ex DC.        | 12.2                             | 30.8      | 5.6     | 19.0      | **       |
| 7             | Fabaceae        | Leaves    | <i>Dialium guineense</i> Willd.                       | 13.4                             | 32.7      | 3.5     | 9.5       | **       |
| 8             | Fabaceae        | Leaves    | <i>Piliostigma thonningii</i> (Schumach.) Milne-Redh. | 13.6                             | 54.2      | 5.4     | 18.8      | **       |
| 9             | Caricaceae      | Leaves    | <i>Carica papaya</i> L.                               | 14.3                             | 37.6      | 8.4     | 27.3      | **       |
| 10            | Fabaceae        | Leaves    | <i>Tephrosia purpurea</i> (L.) Pers.                  | 15.1                             | 61.2      | 12.7    | 31.6      | **       |
| 11            | Malvaceae       | Leaves    | <i>Malvastrum coromandelianum</i> (L.) Garcke         | 18.9                             | 76.7      | 15.4    | 50.5      | *        |
| 12            | Solanaceae      | Leaves    | <i>Datura metel</i> L.                                | 19.2                             | 61.6      | 7.5     | 33.6      | *        |
| 13            | Sapotaceae      | Leaves    | <i>Chrysophyllum albidum</i> G.Don                    | 19.5                             | 50.4      | 14.7    | 29.4      | *        |
| 14            | Astaraceae      | Leaves    | <i>Chromolaena odorata</i> (L.) R.M King & H.Rob.     | 21.1                             | 94.2      | 20.8    | 72.6      |          |
| 15            | Cucurbitaceae   | Leaves    | <i>Momordica charantia</i> L.                         | 21.3                             | 69.9      | 11.0    | 46.5      |          |
| 16            | Apocynaceae     | Stem bark | <i>Saba florida</i> (Benth.) Bullock                  | 22.9                             | 65.0      | 12.0    | 44.3      |          |
| 17            | Fabaceae        | Leaves    | <i>Cassia biflora</i> L.                              | 23.4                             | 48.9      | 7.2     | 16.1      |          |
| 18            | Sapindaceae     | Leaves    | <i>Blighia sapida</i> K. D. Koenig                    | 24.3                             | 47.2      | 12.2    | 22.2      |          |
| 19            | Fabaceae        | Leaves    | <i>Milletia thonningii</i> (Schum. & Thonn.) Baker    | 24.3                             | 57.3      | 14.4    | 43.9      |          |
| 20            | Euphorbiaceae   | Root bark | <i>Bridelia micrantha</i> Baill.                      | 25.0                             | 73.0      | 10.0    | 44.0      |          |
| 21            | Rutaceae        | Leaves    | <i>Clausena anisata</i> Hook.f., De Wild. & Staner    | 26.1                             | 36.5      | 15.4    | 31.2      |          |
| 22            | Fabaceae        | Leaves    | <i>Cassia siamea</i> Lam.                             | 26.2                             | 52.1      | 5.2     | 11.4      |          |
| 23            | Fabaceae        | Leaves    | <i>Leucaena leucocephala</i> (Lam.) de Wit            | 26.5                             | 72.2      | 11.6    | 41.7      |          |

Table S1. continued.

| No. of Plants | Family         | Part Used | Scientific Names                                          | Growth Elongation (% of Control) |           |         |           | Criteria |
|---------------|----------------|-----------|-----------------------------------------------------------|----------------------------------|-----------|---------|-----------|----------|
|               |                |           |                                                           | 10 mg                            |           | 50 mg   |           |          |
|               |                |           |                                                           | Radicle                          | Hypocotyl | Radicle | Hypocotyl |          |
| 24            | Meliaceae      | Leaves    | <i>Entandrophragma cylindricum</i> Sprague                | 27.6                             | 92.4      | 15.3    | 56.8      |          |
| 25            | Rubiaceae      | Leaves    | <i>Psydrax subcordata</i> (DC.) Bridson                   | 27.7                             | 40.0      | 17.2    | 47.9      |          |
| 26            | Anacardiaceae  | Leaves    | <i>Anacardium occidentale</i> L.                          | 27.8                             | 80.0      | 16.1    | 61.7      |          |
| 27            | Apocynaceae    | Leaves    | <i>Mondia whiteii</i> (Hook.f.) Skeels                    | 28.1                             | 44.0      | 13.2    | 26.0      |          |
| 28            | Moraceae       | Leaves    | <i>Treculia africana</i> Decne. ex Trécul                 | 28.2                             | 80.0      | 20.4    | 57.8      |          |
| 29            | Euphorbiaceae  | Stem bark | <i>Bridelia micrantha</i> Baill.                          | 28.2                             | 87.8      | 15.4    | 52.3      |          |
| 30            | Fabaceae       | Leaves    | <i>Parkia biglobosa</i>                                   | 29.8                             | 62.7      | 14.9    | 35.7      |          |
| 31            | Moraceae       | Leaves    | <i>Ficus exasperata</i> Roxb.                             | 30.0                             | 80.5      | 15.7    | 57.1      |          |
| 32            | Euphorbiaceae  | Leaves    | <i>Manihot esculentus</i> L.                              | 30.4                             | 106       | 37.1    | 95.8      |          |
| 33            | Nyctaginaceae  | Leaves    | <i>Boerhavia diffusa</i> L.                               | 30.4                             | 52.7      | 7.3     | 14.4      |          |
| 34            | Asclepiadaceae | Leaves    | <i>Calotropis procera</i> (Aiton) W.T.Aiton               | 31.1                             | 77.4      | 11.2    | 53.7      |          |
| 35            | Portulacaceae  | Leaves    | <i>Talinum triangulare</i> (Jacq.) Willd.                 | 32.1                             | 128.2     | 20.4    | 57.9      |          |
| 36            | Olacaceae      | Leaves    | <i>Olax subscorpioidea</i> Oliv.                          | 32.4                             | 66.4      | 22.1    | 41.6      |          |
| 37            | Sapotaceae     | Leaves    | <i>Synsepalum dulcificum</i> (Schumach. & Thonn.) Daniell | 33.0                             | 53.9      | 12.9    | 25.7      |          |
| 38            | Cyperaceae     | Leaves    | <i>Cyperus esculentus</i> L.                              | 33.0                             | 103.0     | 23.0    | 74.0      |          |
| 39            | Amaranthaceae  | Leaves    | <i>Amaranthus spinosus</i> L.                             | 33.6                             | 42.7      | 17.5    | 41.1      |          |
| 40            | Verbenaceae    | Leaves    | <i>Duranta erecta</i> L.                                  | 33.7                             | 62.9      | 8.8     | 22.0      |          |
| 41            | Sapindaceae    | Leaves    | <i>Paullina pinnata</i> L.                                | 33.8                             | 70.4      | 22.0    | 67.2      |          |
| 42            | Boraginaceae   | Leaves    | <i>Heliotropium indicum</i> L.                            | 34.1                             | 104.9     | 45.2    | 116       |          |
| 43            | Capparaceae    | Leaves    | <i>Capparis fascicularis</i> DC.                          | 34.6                             | 73.2      | 16.7    | 43.9      |          |
| 44            | Tiliaceae      | Leaves    | <i>Grewia carpinifolia</i> Juss.                          | 35.0                             | 92.2      | 11.6    | 50.8      |          |
| 45            | Passifloraceae | Leaves    | <i>Adenia cissampeloides</i> (Planch. ex Benth.) Harms    | 35.2                             | 103.3     | 12.0    | 91.2      |          |

Table S1. continued.

| No. of Plants | Family      | Part used | Scientific Names                    | Growth Elongation (% of Control) |           |         |           | Criteria |
|---------------|-------------|-----------|-------------------------------------|----------------------------------|-----------|---------|-----------|----------|
|               |             |           |                                     | 10 mg                            |           | 50 mg   |           |          |
|               |             |           |                                     | Radicle                          | Hypocotyl | Radicle | Hypocotyl |          |
| 46            | Fabaceae    | Leaves    | <i>Tetrapleura tetraptera</i> Taub. | 35.7                             | 69.2      | 36.4    | 67.3      |          |
| 47            | Sapindaceae | Roots     | <i>Paullinia pinnata</i> L.         | 36.1                             | 92.7      | 20.6    | 95.7      |          |
| 48            | Cyperaceae  | Leaves    | <i>Cyperus rotundus</i> L.          | 36.3                             | 54.7      | 21.9    | 43.8      |          |
| 49            | Fabaceae    | Leaves    | <i>Baphia nitida</i> Lodd.          | 36.1                             | 84.3      | 13.1    | 47.5      |          |
| 50            | Fabaceae    | Leaves    | <i>Senna alata</i> (L.).Roxb.       | 37.1                             | 77.4      | 13.2    | 30.9      |          |
|               |             |           | M                                   | 25.4                             | 63.5      | 14.2    | 42.3      |          |
|               |             |           | SD                                  | 9.3                              | 26.8      | 8.6     | 24.9      |          |
|               |             | ****      | M-2.0SD                             | 6.8                              |           |         |           |          |
|               |             | ***       | M-1.5SD                             | 11.5                             |           |         |           |          |
|               |             | **        | M-1.0SD                             | 16.1                             |           |         |           |          |
|               |             | *         | M-0.5SD                             | 20.7                             |           |         |           |          |

<sup>1</sup>Evaluation of allelopathic potential was done using the Sandwich method (Fujii et al., 2002). The sandwich bioassay is used to assess the potential plant growth inhibitory activity of plants that are exhibited through leachates.<sup>2</sup>M-Average, SD- Standard deviation. <sup>3</sup>Criteria: Stronger inhibitory activity on the radicle with increasing number of \*. \* M-0.5 (SD), \*\* M-1(SD), \*\*\* M-1.5(SD), and \*\*\*\* M-2.5(SD). .
